# Supplementary material for: Vapor-phase oxidation of cyclohexane over supported Fe–Mn catalysts: in situ DRIFTS studies
Source: Royal Society of Chemistry journal article supplement (doi:10.1039/d1cp01009c), 2021-01-01
Supplement: d1cp01009c1.pdf [file d1cp01009c1.pdf]

## Vapor-Phase Oxidation of Cyclohexane over Supported Fe-Mn Catalysts: *In-Situ* DRIFTS studies

Vijendra Kumar Yadav, Taraknath Das\*

Heterogeneous Catalysis Laboratory (Reaction Engineering), Department of Chemical Engineering, Indian Institute Technology Roorkee, Haridwar, Uttarakhand, India 247667, Email: taraknath.das@ch.iitr.ac.in or tarak3581@gmail.com

### Supporting material:

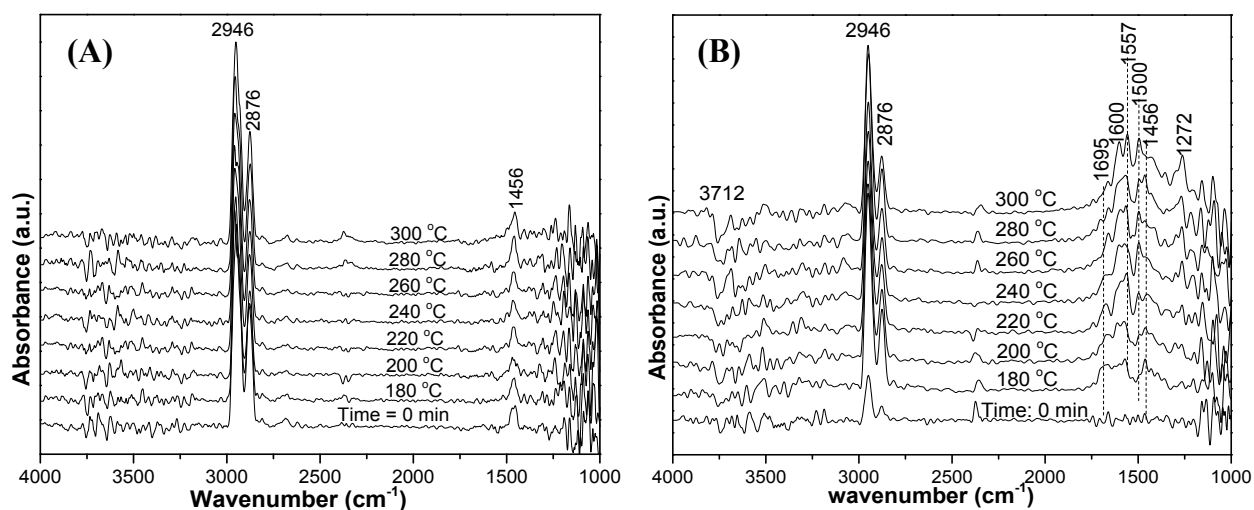

**Fig. S1:** *In-situ* DRIFTS adsorption of cyclohexane (Cy-H) over the catalysts (A)  $\text{Al}_2\text{O}_3$ , and (B)  $20\text{Fe}_{50}\text{Mn}_{50}/\text{Al}_2\text{O}_3$  by changing the adsorption temperature from 180 °C to 300 °C.

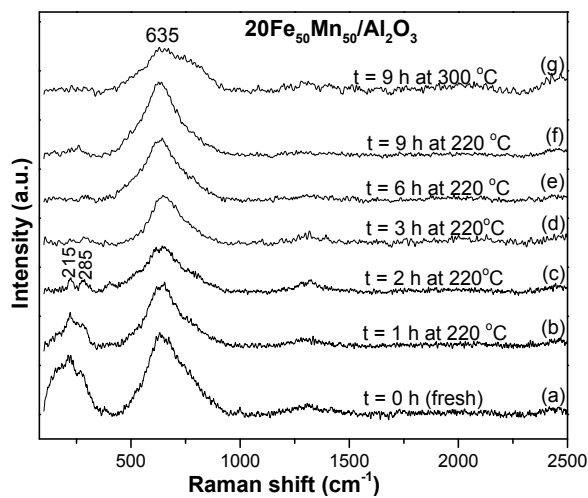

**Fig. S2:** The Raman spectra of the used catalysts  $20\text{Fe}_{50}\text{Mn}_{50}/\text{Al}_2\text{O}_3$  studied for the cyclohexane oxidation reaction for (a) fresh catalyst (with no reaction),  $t = 0$  h, (b) 1 h, (c) 2 h, (d) 3 h, (e) 6 h, (f) 9 h at  $220^\circ\text{C}$ , and (g) at  $300^\circ\text{C}$  for 9 h.

Table-S1: H<sub>2</sub> consumption of the synthesized catalysts during the H<sub>2</sub>-TPR studies

| Catalysts                                                           | H <sub>2</sub> -Consumption<br>(ml/g <sub>cat</sub> ) | H <sub>2</sub> -Consumption<br>(μmole/g <sub>cat</sub> ) | H <sub>2</sub> -Consumption<br>(mole H <sub>2</sub> /(Mn+Fe<br>mole)) |
|---------------------------------------------------------------------|-------------------------------------------------------|----------------------------------------------------------|-----------------------------------------------------------------------|
| Al <sub>2</sub> O <sub>3</sub>                                      | -                                                     | -                                                        | -                                                                     |
| 20Fe <sub>100</sub> Mn <sub>0</sub> /Al <sub>2</sub> O <sub>3</sub> | 43.69                                                 | 1950                                                     | 0.55                                                                  |
| 20Fe <sub>75</sub> Mn <sub>25</sub> /Al <sub>2</sub> O <sub>3</sub> | 46.26                                                 | 2065                                                     | 0.58                                                                  |
| 20Fe <sub>50</sub> Mn <sub>50</sub> /Al <sub>2</sub> O <sub>3</sub> | 68.61                                                 | 3063                                                     | 0.85                                                                  |
| 20Fe <sub>25</sub> Mn <sub>75</sub> /Al <sub>2</sub> O <sub>3</sub> | 58.23                                                 | 2599                                                     | 0.72                                                                  |
| 20Fe <sub>0</sub> Mn <sub>100</sub> /Al <sub>2</sub> O <sub>3</sub> | 54.91                                                 | 2451                                                     | 0.68                                                                  |
| 5Fe <sub>50</sub> Mn <sub>50</sub> /Al <sub>2</sub> O <sub>3</sub>  | 23.45                                                 | 1047                                                     | 1.16                                                                  |
| 10Fe <sub>50</sub> Mn <sub>50</sub> /Al <sub>2</sub> O <sub>3</sub> | 32.73                                                 | 1461                                                     | 0.81                                                                  |
| 15Fe <sub>50</sub> Mn <sub>50</sub> /Al <sub>2</sub> O <sub>3</sub> | 48.93                                                 | 2184                                                     | 0.81                                                                  |
| 20Fe <sub>50</sub> Mn <sub>50</sub> /Al <sub>2</sub> O <sub>3</sub> | 68.61                                                 | 3063                                                     | 0.85                                                                  |
| 25Fe <sub>50</sub> Mn <sub>50</sub> /Al <sub>2</sub> O <sub>3</sub> | 78.65                                                 | 3511                                                     | 0.78                                                                  |
